# Supplementary material
Source: Springer Nature journal article supplement (https://www.springermedizin.de/resource/supplementary/12874_2011_740_MOESM2_ESM.pdf/9432830)

# Random effects Meta-Analysis of Hazard Ratios

Poisson GLMs, interval length = 0.5 years

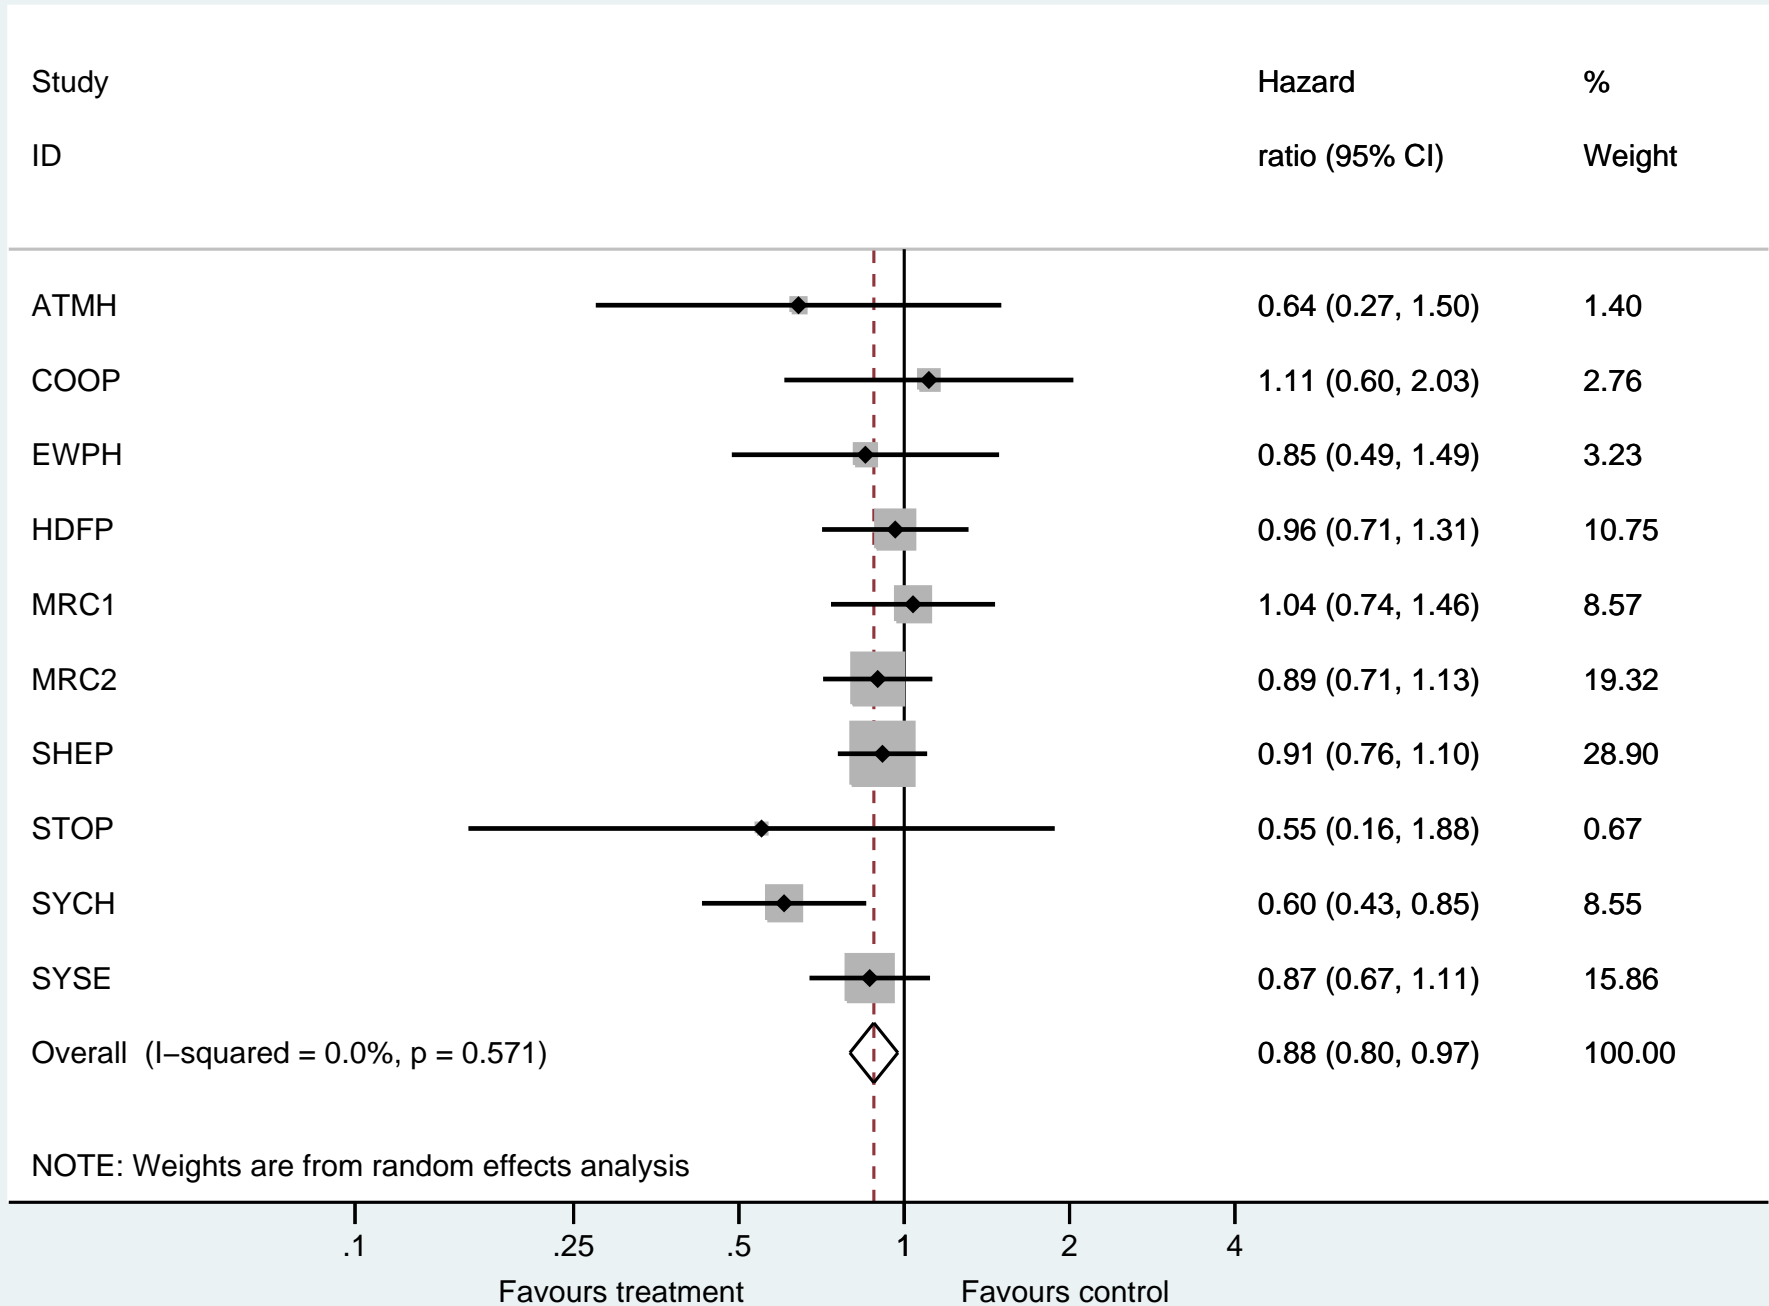

Supplement: MOESM2 [file 9432830]
